# Supplementary material for: Coating of bioactive glass particles with mussel-inspired polydopamine as a strategy to improve the thermal stability of poly(l-lactide)/bioactive glass composites
Source: Royal Society of Chemistry journal article supplement (doi:10.1039/c5ra09495j), 2015-01-01
Supplement: c5ra09495j9.pdf [file c5ra09495j9.pdf]

## Supporting Information

Coating of Bioactive Glass Particles with Mussel-Inspired Polydopamine as a Strategy to Improve Thermal Stability of Poly(L-lactide)/Bioactive Glass Composites

Aitor Larrañaga<sup>a,†,\*</sup>, Daniel Ramos<sup>a,†</sup>, Hegoi Amestoy<sup>a</sup>, Ester Zuza<sup>a</sup>, Jose-Ramon Sarasua<sup>a</sup>

<sup>a</sup> University of the Basque Country (UPV/EHU), Department of Mining-Metallurgy Engineering and Materials Science & POLYMAT, School of Engineering, Alameda de Urquijo s/n, 480130 Bilbao, Spain.

† These authors contributed to the work equally.

\* Corresponding author: Phone: +0034 946 017 318.

Fax: +34-94-601-3930.

E-mail: aitor.larranagae@ehu.eus (A. Larrañaga).

## List of Figures

**Figure S1.-** Dispersion of BG (left) and mBG (right) particles at  $t=0$  min (A) and  $t=60$  min (B)

**Figure S2.-** FTIR spectra of mBG (a) and BG (b) particles.

**Figure S3.-** TGA profiles of BG and mBG particles.

**Figure S4.-** Remaining weight of PLLA samples containing 5,10 or 15 vol.% of BG or mBG particles during the isothermal treatment at 210 °C.

**Figure S5.-** Dumbbell-shaped PLLA samples for tensile test containing 5, 10 or 15 vol.% of BG (above) or mBG (below) particles.

**Figure S6.-** Stress-strain curves of PLLA samples containing 5, 10 or 15 vol.% of BG or mBG particles.

**Figure S7.-** FTIR spectra of mBG particles submerged in SBF for 0, 1, 3 and 7 days.
