# Supplementary figures and images for: Coating of bioactive glass particles with mussel-inspired polydopamine as a strategy to improve the thermal stability of poly(l-lactide)/bioactive glass composites
Source: Royal Society of Chemistry journal article supplement (doi:10.1039/c5ra09495j), 2015-01-01

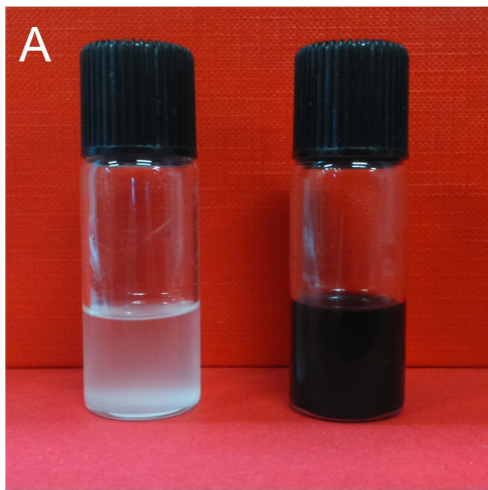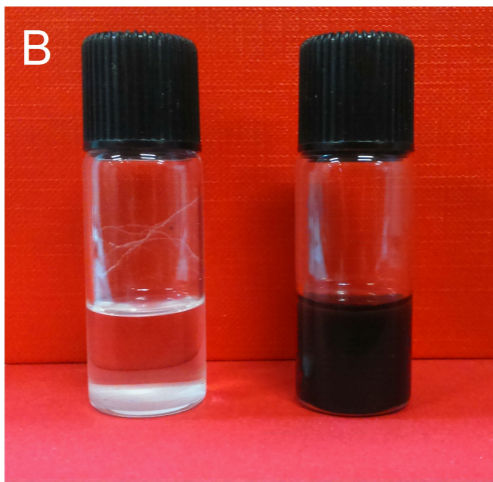

Supplement: c5ra09495j2.pdf [file c5ra09495j2.pdf]

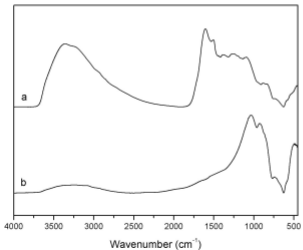

Supplement: c5ra09495j3.pdf [file c5ra09495j3.pdf]

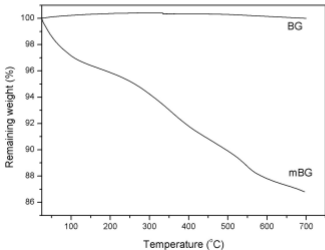

Supplement: c5ra09495j4.pdf [file c5ra09495j4.pdf]

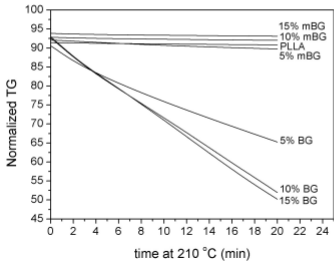

Supplement: c5ra09495j5.pdf [file c5ra09495j5.pdf]

0%

5%

10%

15%

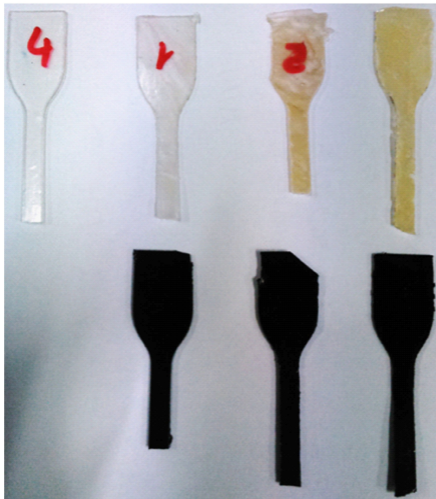

Supplement: c5ra09495j6.pdf [file c5ra09495j6.pdf]

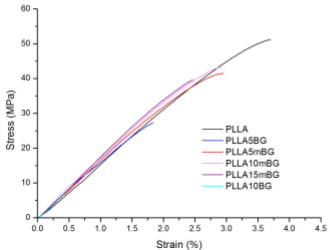

Supplement: c5ra09495j7.pdf [file c5ra09495j7.pdf]

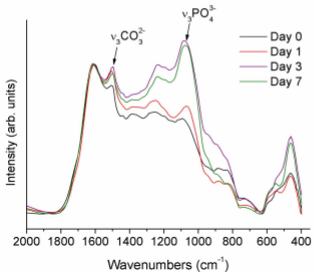

Supplement: c5ra09495j8.pdf [file c5ra09495j8.pdf]
